# Supplementary material for: The Microalgae Phaeodactylum tricornutum Is Well Suited as a Food with Positive Effects on the Intestinal Microbiota and the Generation of SCFA: Results from a Pre-Clinical Study
Source: MDPI journal article supplement (doi:10.3390/nu14122504), 2022-06-16
Supplement: s1 [file s1]

# Supplementary Materials

**Table S1** Histological scores of the liver, ileum, and colon after 14 days of diet supplementation.

| Diet    | Supplementation [%] | Liver Score   | Cell Damage Ileum | Infil Ileum   | Cell Damage Colon | Infil Colon   |
|---------|---------------------|---------------|-------------------|---------------|-------------------|---------------|
| CD      |                     | $\pm 0.1$     | $0.0 \pm 0.0$     | $0.1 \pm 0.1$ | $0.0 \pm 0.0$     | $0.0 \pm 0.1$ |
| Chrl    | 15                  | $0.2 \pm 0.4$ | $0.0 \pm 0.0$     | $0.3 \pm 0.9$ | $0.0 \pm 0.0$     | $0.2 \pm 0.4$ |
|         | 25                  | $0.3 \pm 0.6$ | $0.1 \pm 0.3$     | $0.1 \pm 0.3$ | $0.0 \pm 0.0$     | $0.2 \pm 0.4$ |
| EPA/ Fx | 15                  | $0.2 \pm 0.4$ | $0.0 \pm 0.0$     | $0.1 \pm 0.3$ | $0.2 \pm 0.4$     | $0.1 \pm 0.3$ |
|         | 25                  | $0.4 \pm 0.5$ | $0.0 \pm 0.0$     | $0.0 \pm 0.1$ | $0.0 \pm 0.0$     | $0.0 \pm 0.1$ |

The ANOVA showed no significant differences. Histological scores were measured after the diets were supplemented to 15% and 25%. Data are expressed as mean  $\pm$  SD (n= 4). Abbreviations: Infil, Infiltration; other abbreviations see Table1.

**Table S2.** Bacterial taxa in feces after 14 days supplementation of the CD and Chrl- rich and EPA/Fx PT diets.

| Treatments               | CD        | Chrl5       | Chrl15       | Chrl25       | EPA/Fx5       | EPA/Fx15    | EPA/Fx25    |
|--------------------------|-----------|-------------|--------------|--------------|---------------|-------------|-------------|
| <b>Phylum</b>            |           |             |              |              |               |             |             |
| <b>Bacteroidota (B)</b>  | 37.4±3.4  | 46.8±4.0*** | 46.2±2.6**   | 43.6±3.1     | 47.5±2.2**    | 50.6±4.1*** | 45.6±4.7**  |
| <b>Firmicutes (F)</b>    | 49.7±8.0  | 28.2±2.9*** | 21.9±26.3*** | 26.3±3.3***  | 39.4±2.1*     | 29.4±4.3*** | 26.8±4.7*** |
| <b>F/B ratio</b>         | 1.3±0.3   | 0.6±0.1***  | 0.48±0.1***  | 0.60±0.1***  | 0.8±0.1***    | 0.6±0.01*** | 0.6±0.1***  |
| <b>Verrucomicrobiota</b> | 2.5±5.6   | 3.9±5.0     | 14.02±2.7**  | 13.08± 4.0** | 1.094±1.3     | 9.0±6.1     | 10.3±5.4    |
| <b>Actinobacteriota</b>  | 1.0±1.5   | 0.05±0.0*   | 0.00±0.0*    | 0.0±0.0*     | 0.06±0.0      | 0.04±0.0*   | 0.00±0.0*   |
| <b>Desulfobacterota</b>  | 3.1±2.3   | 7.1±2.3**   | 5.1±1.6      | 3.2±1.1      | 7.6±0.8**     | 5.9±1.3     | 5.0±1.0     |
| <b>Cyanobacteria</b>     | 0.3±0.3   | 11.4±4.0*** | 9.8±7.7**    | 10.4±5.4**   | 0.4±0.3##     | 1.0±0.3#    | 1.8±0.9#    |
| <b>Class</b>             |           |             |              |              |               |             |             |
| <b>Bacteroidia</b>       | 37.4±3.2  | 46.8±4.0*** | 46.2±2.6**   | 43.6±3.1     | 47.5±2.3**    | 50.6±4.1*** | 45.6±4.7**  |
| <b>Clostridia</b>        | 31.4±17.9 | 26.4±3.2    | 20.7±5.1     | 24.8±3.5     | 37.8±2.1      | 28.4±4.3    | 24.6±3.8    |
| <b>Verrucomicrobiae</b>  | 2.6±5.7   | 3.9±5.0     | 14.0±2.7**   | 13.1±3.9**   | 1.1±1.3       | 9.0±6.1     | 10.3±5.5    |
| <b>Cyanobacteriia</b>    | 0.02±0.05 | 11.1±4.0**  | 8.8±7.8      | 9.5±5.0*     | 0.08±0.06##   | 0.09±0.03   | 0.1±0.1#    |
| <b>Order</b>             |           |             |              |              |               |             |             |
| <b>Lachnospirales</b>    | 20.0±11.7 | 13.5±3.4    | 8.2±4.6**    | 6.1±2.7***   | 16.4±4.1      | 7.9±0.4*    | 5.1±3.0***  |
| <b>Oscillospirales</b>   | 9.5±5.4   | 9.7±1.8     | 9.8±1.9      | 6.3±1.3      | 18.3±2.0**### | 13.4±1.7    | 7.3±4.8     |
| <b>Genus</b>             | CD        | Chrl5       | Chrl15       | Chrl25       | EPA/Fx5       | EPA/Fx15    | EPA/Fx25    |
| <b>Muribaculaceae</b>    | 17.1±14.1 | 27.4±3.9    | 28.1±5.6     | 26.8±4.0     | 31.8±3.5*     | 25.4±3.3    | 16.7±3.2    |

|                                                                                      |           |            |            |             |            |             |               |
|--------------------------------------------------------------------------------------|-----------|------------|------------|-------------|------------|-------------|---------------|
| Alistipes                                                                            | 5.1±6.4   | 16.5±6.2** | 10.7±3.6   | 9.6±1.8     | 17.9±2.7** | 18.7±5.9*** | 14.3±4.0*     |
| Parabacteroides                                                                      | 14.8±17.4 | 4.8±3.5    | 7.7±8.4    | 8.6±3.8     | 8.9±8.4    | 10.7±1.1    | 14.8±3.9      |
| Dubosiella                                                                           | 8.4±8.0   | 1.5±1.9    | 0.6±0.5    | 1.0±0.7     | 1.4±1.2    | 0.5±0.2     | 0.8±0.7       |
| Clostridia_vadinBB60_group                                                           | 0.6±0.8   | 2.8±2.3    | 1.6±1.3    | 13.0±3.9*** | 5.7±3.5    | 8.3±4.7*#   | 14.6±4.8***   |
| Parasutterella                                                                       | 6.8±5.9   | 2.7±1.4    | 2.1±0.7*   | 3.2±1.2     | 3.8±1.7    | 2.7±1.1     | 5.8±1.5       |
| Akkermansia                                                                          | 3.4±7.6   | 5.1±6.2    | 17.8±3.3** | 15.4±5.2*   | 1.7±1.9    | 11.6±7.7    | 12.7±6.3      |
| Bacteroides                                                                          | 3.7±5.6   | 5.9±3.7    | 5.4±7.1    | 1.4±1.2     | 3.5±2.1    | 1.0±0.1     | 1.3±1.3       |
| Species, OTUs                                                                        | CD        | Chr15      | Chr115     | Chr125      | EPA/Fx5    | EPA/Fx15    | EPA/Fx25      |
| OTU17:<br>Muribaculaceae;s__uncultured_bacterium                                     | 4.0±3.2   | 3.6±1.4    | 5.7±1.9    | 4.3±0.8     | 6.8±3.8    | 8.3±2.1*    | 5.3±2.1       |
| OTU18:<br>Muribaculaceae;s__unidentified                                             | 0.8±0.9   | 10.0±2.7** | 7.1±4.6*   | 7.4±2.9*    | 5.3±5.1    | 6.1±2.6     | 3.6±3.8       |
| OTU 22:<br>Alistipes;__unidentified                                                  | 3.7±4.6   | 11.5±4.4** | 8.47±2.8   | 8.2±1.7     | 11.8±2.0*  | 13.7±4.8*** | 10.9±3.6*     |
| OTU 24:<br>Parabacteroides_goldsteinii                                               | 12.9±16.3 | 3.9±2.7    | 6.0±6.0    | 7.5±3.5     | 5.8±5.5    | 9.6±3.4     | 11.3±3.2      |
| OTU 32:<br>Cyanobacteria;o__Chloroplast;f__Chloroplast;g__Chloroplast;__unidentified | 0.0±0.0   | 10.2±3.6** | 8.8±7.8*   | 9.5±5.0**   | 0.1±0.06## | 0.1±0.06##  | 0.1±0.1##     |
| OTU 35:<br>Desulfovibrionaceae;g__uncultured;s__uncultured_bacterium                 | 3.0±2.4   | 7.0±2.4**  | 4.6±1.6    | 2.9±1.1     | 7.3±1.1**  | 5.0±1.1     | 4.7±1.1       |
| OTU 54:<br>Clostridia_vadinBB60_group;__unidentified                                 | 0.16±     | 0.8±1.1    | 0.4±0.3    | 8.8±1.3***  | 0.4±0.6    | 2.3±1.2     | 4.1±2.3***### |
| OTU 145:<br>Burkholderiales_bacterium                                                | 5.7±6.1   | 2.0±1.0    | 1.7±0.5*   | 2.7±0.9     | 2.5±1.0    | 2.1±0.7     | 4.6±1.2       |

|                                       |         |         |            |            |         |          |          |
|---------------------------------------|---------|---------|------------|------------|---------|----------|----------|
| OTU150:<br>Akkermansia;__unidentified | 2.5±5.7 | 4.1±5.3 | 14.0±2.7** | 13.1±3.9** | 1.1±1.3 | 10.0±6.0 | 10.4±5.4 |
|---------------------------------------|---------|---------|------------|------------|---------|----------|----------|

Values are expressed as the relative bacterial abundances [%] (CD n = 5; Chr15 n = 8; Chr115 n = 7; Chr125 n = 8; EPA/Fx5 n = 4; EPA/Fx15 n = 6; EPA/Fx25 n = 6). Statistics: \* indicate differences to CD and # indicates difference between Chr1 and EPA/Fx diets5%, 15%, 25%. \*/# p < 0.05, \*\*/## p < 0.01, \*\*\*/### p < 0.001. Abbreviations: OTUs, operational taxonomic unit's; further abbreviations see Figure 3.
